# Supplementary material for: Characterization of host plant resistance to zebra chip disease from species-derived potato genotypes and the identification of new sources of zebra chip resistance
Source: PubMed Central journal article supplement (PMC5568414; doi:10.1371/journal.pone.0183283), 2017-08-23
Supplement: pone.0183283.s001.pdf [file pone.0183283.s001.pdf]

| Subject | year | Plant | Genotype    | Lso status* | Psyllid titer |
|---------|------|-------|-------------|-------------|---------------|
| 1       | 2014 | 1     | A05379-211  | 1           | 2350000       |
| 2       | 2014 | 2     | A05379-211  | 0           | 883000        |
| 3       | 2014 | 3     | A05379-211  | 0           | 37500000      |
| 4       | 2014 | 4     | A05379-211  | 1           | 8520000       |
| 5       | 2014 | 5     | A05379-211  | 1           | 6740000       |
| 6       | 2014 | 6     | A05379-211  | 0           | 2300000       |
| 7       | 2014 | 7     | A05379-211  | 1           | 10400000      |
| 8       | 2014 | 8     | A05379-211  | 0           | 6340000       |
| 9       | 2014 | 9     | A05379-211  | 0           | 130000000     |
| 10      | 2014 | 10    | A05379-211  | 0           | 11000000      |
| 11      | 2014 | 1     | A07781-3LB  | 0           | 1130000000    |
| 12      | 2014 | 2     | A07781-3LB  | 0           | 10700000      |
| 13      | 2014 | 3     | A07781-3LB  | 1           | 508000000     |
| 14      | 2014 | 4     | A07781-3LB  | 0           | 416000        |
| 15      | 2014 | 1     | A07781-10LB | 0           | 116000000     |
| 16      | 2014 | 2     | A07781-10LB | 0           | 15400000      |
| 17      | 2014 | 3     | A07781-10LB | 1           | 763000000     |
| 18      | 2014 | 4     | A07781-10LB | 0           | 473000000     |
| 19      | 2014 | 5     | A07781-10LB | 0           | 20100000      |
| 20      | 2014 | 6     | A07781-10LB | 1           | 4400000       |
| 21      | 2014 | 7     | A07781-10LB | 1           | 1050000000    |
| 22      | 2014 | 8     | A07781-10LB | 0           | 212000000     |
| 23      | 2014 | 9     | A07781-10LB | 0           | 260000000     |
| 24      | 2014 | 10    | A07781-10LB | 0           | 8670000000    |
| 25      | 2014 | 1     | A07701-6LB  | 0           | 3960000000    |
| 26      | 2014 | 2     | A07701-6LB  | 0           | 119000        |
| 27      | 2014 | 3     | A07701-6LB  | 1           | 10600000      |
| 28      | 2014 | 4     | A07701-6LB  | 1           | 386000000     |
| 29      | 2014 | 5     | A07701-6LB  | 1           | 1670000       |
| 30      | 2014 | 6     | A07701-6LB  | 0           | 753000000     |
| 31      | 2014 | 7     | A07701-6LB  | 1           | 26600000      |
| 32      | 2014 | 8     | A07701-6LB  | 1           | 7200000       |
| 33      | 2014 | 1     | A07705-4LB  | 1           | 54100000      |
| 34      | 2014 | 2     | A07705-4LB  | 0           | 60300000      |
| 35      | 2014 | 3     | A07705-4LB  | 1           | 28400000      |
| 36      | 2014 | 4     | A07705-4LB  | 0           | 18300000      |
| 37      | 2014 | 5     | A07705-4LB  | 0           | 844000        |
| 38      | 2014 | 6     | A07705-4LB  | 1           | 43100000      |
| 39      | 2014 | 7     | A07705-4LB  | 1           | 73300000      |
| 40      | 2014 | 8     | A07705-4LB  | 1           | 3450000000    |
| 41      | 2014 | 9     | A07705-4LB  | 1           |               |

|    |      |    |            |   |            |
|----|------|----|------------|---|------------|
| 42 | 2014 | 10 | A07705-4LB | 0 |            |
| 43 | 2014 | 1  | RB         | 1 | 79100      |
| 44 | 2014 | 2  | RB         | 1 | 44800000   |
| 45 | 2014 | 3  | RB         | 1 | 567000     |
| 46 | 2014 | 4  | RB         | 0 | 30500      |
| 47 | 2014 | 5  | RB         | 0 | 1940000000 |
| 48 | 2014 | 6  | RB         | 0 | 41500000   |
| 49 | 2014 | 7  | RB         | 1 | 7940000    |
| 50 | 2014 | 8  | RB         | 0 | 2350000000 |
| 51 | 2014 | 9  | RB         | 0 | 11000000   |
| 52 | 2014 | 1  | A07701-8LB | 0 | 347000     |
| 53 | 2014 | 2  | A07701-8LB | 1 | 10200000   |
| 54 | 2014 | 3  | A07701-8LB | 1 | 18600000   |
| 55 | 2014 | 4  | A07701-8LB | 1 | 72400000   |
| 56 | 2014 | 5  | A07701-8LB | 1 | 20100000   |
| 57 | 2014 | 6  | A07701-8LB | 0 | 3010000    |
| 58 | 2014 | 7  | A07701-8LB | 0 | 151000000  |
| 59 | 2014 | 1  | A02449-100 | 0 | 1610000000 |
| 60 | 2014 | 2  | A02449-100 | 1 | 71600000   |
| 61 | 2014 | 3  | A02449-100 | 0 | 889000000  |
| 62 | 2014 | 4  | A02449-100 | 1 | 742000000  |
| 63 | 2014 | 5  | A02449-100 | 1 | 20300000   |
| 64 | 2014 | 1  | A05214-3LB | 1 | 78300      |
| 65 | 2014 | 2  | A05214-3LB | 0 | 65500000   |
| 66 | 2014 | 3  | A05214-3LB | 0 | 6780000    |
| 67 | 2014 | 4  | A05214-3LB | 0 | 1190000000 |
| 68 | 2014 | 5  | A05214-3LB | 0 | 61300      |
| 69 | 2014 | 6  | A05214-3LB | 0 | 1740000    |
| 70 | 2014 | 7  | A05214-3LB | 0 | 3630000    |
| 71 | 2014 | 8  | A05214-3LB | 0 | 5240000    |
| 72 | 2014 | 9  | A05214-3LB | 0 | 124000     |
| 73 | 2014 | 1  | A07781-4LB | 1 | 23900000   |
| 74 | 2014 | 2  | A07781-4LB | 0 | 47700000   |
| 75 | 2014 | 3  | A07781-4LB | 0 | 19600000   |
| 76 | 2014 | 4  | A07781-4LB | 1 | 5380000    |
| 77 | 2014 | 5  | A07781-4LB | 0 | 164000     |
| 78 | 2014 | 6  | A07781-4LB | 0 | 83100000   |
| 79 | 2014 | 7  | A07781-4LB | 0 | 10600000   |
| 80 | 2014 | 8  | A07781-4LB | 0 | 199000     |
| 81 | 2014 | 9  | A07781-4LB | 0 | 1850000    |
| 82 | 2014 | 1  | 463-4      | 0 | 40800000   |
| 83 | 2014 | 2  | 463-4      | 1 | 66000000   |

|     |      |    |             |   |            |
|-----|------|----|-------------|---|------------|
| 84  | 2014 | 3  | 463-4       | 1 | 56800000   |
| 85  | 2014 | 4  | 463-4       | 0 | 216000000  |
| 86  | 2014 | 5  | 463-4       | 1 | 37900000   |
| 87  | 2014 | 6  | 463-4       | 0 | 245000000  |
| 88  | 2014 | 7  | 463-4       | 0 | 273000     |
| 89  | 2014 | 8  | 463-4       | 0 | 3660000    |
| 90  | 2014 | 9  | 463-4       | 0 | 2710000    |
| 91  | 2014 | 1  | P2-4        | 1 | 231000000  |
| 92  | 2014 | 2  | P2-4        | 0 | 29100000   |
| 93  | 2014 | 3  | P2-4        | 1 | 207000000  |
| 94  | 2014 | 4  | P2-4        | 0 | 71800000   |
| 95  | 2014 | 5  | P2-4        | 0 | 20000000   |
| 96  | 2014 | 6  | P2-4        | 1 | 32800000   |
| 97  | 2014 | 7  | P2-4        | 0 | 176000000  |
| 98  | 2014 | 8  | P2-4        | 1 | 347000000  |
| 99  | 2014 | 9  | P2-4        | 1 | 109000000  |
| 100 | 2014 | 10 | P2-4        | 0 | 298000000  |
| 101 | 2014 | 11 | P2-4        | 0 | 206000000  |
| 102 | 2015 | 1  | A05379-211  | 0 | 123000000  |
| 103 | 2015 | 2  | A05379-211  | 0 | 1360000000 |
| 104 | 2015 | 3  | A05379-211  | 0 | 163000000  |
| 105 | 2015 | 4  | A05379-211  | 0 | 195000000  |
| 106 | 2015 | 5  | A05379-211  | 0 |            |
| 107 | 2015 | 6  | A05379-211  | 0 | 41200000   |
| 108 | 2015 | 7  | A05379-211  | 0 | 1100000000 |
| 109 | 2015 | 8  | A05379-211  | 0 | 495000000  |
| 110 | 2015 | 9  | A05379-211  | 0 | 292000000  |
| 111 | 2015 | 10 | A05379-211  | 0 | 59100000   |
| 112 | 2015 | 1  | A07781-3LB  | 0 | 255000000  |
| 113 | 2015 | 2  | A07781-3LB  | 0 | 606000000  |
| 114 | 2015 | 3  | A07781-3LB  | 0 | 1530000000 |
| 115 | 2015 | 4  | A07781-3LB  | 0 | 43000000   |
| 116 | 2015 | 5  | A07781-3LB  | 0 | 89600000   |
| 117 | 2015 | 6  | A07781-3LB  | 0 | 985000000  |
| 118 | 2015 | 7  | A07781-3LB  | 0 | 2790000000 |
| 119 | 2015 | 8  | A07781-3LB  | 0 | 8500000000 |
| 120 | 2015 | 9  | A07781-3LB  | 0 | 273000000  |
| 121 | 2015 | 10 | A07781-3LB  | 0 | 516000000  |
| 122 | 2015 | 1  | A07781-10LB | 0 | 1090000000 |
| 123 | 2015 | 2  | A07781-10LB | 0 | 2190000000 |
| 124 | 2015 | 3  | A07781-10LB | 0 | 397000000  |
| 125 | 2015 | 4  | A07781-10LB | 0 | 2030000000 |

|     |      |    |             |   |            |
|-----|------|----|-------------|---|------------|
| 126 | 2015 | 5  | A07781-10LB | 0 | 413000000  |
| 127 | 2015 | 6  | A07781-10LB | 1 | 104000000  |
| 128 | 2015 | 7  | A07781-10LB | 0 | 223000000  |
| 129 | 2015 | 8  | A07781-10LB | 0 | 727000000  |
| 130 | 2015 | 9  | A07781-10LB | 0 | 3160000000 |
| 131 | 2015 | 1  | A07701-6LB  | 0 | 1420000000 |
| 132 | 2015 | 2  | A07701-6LB  | 0 | 368000000  |
| 133 | 2015 | 3  | A07701-6LB  | 0 | 327000000  |
| 134 | 2015 | 4  | A07701-6LB  | 0 | 1170000000 |
| 135 | 2015 | 5  | A07701-6LB  | 0 | 2130000000 |
| 136 | 2015 | 6  | A07701-6LB  | 0 |            |
| 137 | 2015 | 7  | A07701-6LB  | 1 | 2420000000 |
| 138 | 2015 | 8  | A07701-6LB  | 0 | 215000000  |
| 139 | 2015 | 9  | A07701-6LB  | 1 | 541000000  |
| 140 | 2015 | 1  | A07705-4LB  | 0 | 85200000   |
| 141 | 2015 | 2  | A07705-4LB  | 0 | 1740000000 |
| 142 | 2015 | 3  | A07705-4LB  | 0 | 2050000000 |
| 143 | 2015 | 4  | A07705-4LB  | 0 | 717000000  |
| 144 | 2015 | 5  | A07705-4LB  | 0 | 1530000000 |
| 145 | 2015 | 6  | A07705-4LB  | 0 | 41100000   |
| 146 | 2015 | 7  | A07705-4LB  | 0 | 4380000000 |
| 147 | 2015 | 8  | A07705-4LB  | 1 | 1720000000 |
| 148 | 2015 | 9  | A07705-4LB  | 0 | 108000000  |
| 149 | 2015 | 10 | A07705-4LB  | 0 | 151000000  |
| 150 | 2015 | 1  | RB          | 0 | 198000000  |
| 151 | 2015 | 2  | RB          | 0 | 482000000  |
| 152 | 2015 | 3  | RB          | 1 | 1740000000 |
| 153 | 2015 | 4  | RB          | 0 | 149000000  |
| 154 | 2015 | 5  | RB          | 0 | 105000000  |
| 155 | 2015 | 6  | RB          | 1 |            |
| 156 | 2015 | 7  | RB          | 1 | 385000000  |
| 157 | 2015 | 8  | RB          | 0 |            |
| 158 | 2015 | 9  | RB          | 0 | 161000000  |
| 159 | 2015 | 10 | RB          | 0 | 247000000  |
| 160 | 2015 | 11 | RB          | 0 |            |
| 161 | 2015 | 1  | A07701-8LB  | 0 | 216000000  |
| 162 | 2015 | 2  | A07701-8LB  | 0 | 296000000  |
| 163 | 2015 | 3  | A07701-8LB  | 1 | 1120000000 |
| 164 | 2015 | 4  | A07701-8LB  | 1 | 699000000  |
| 165 | 2015 | 5  | A07701-8LB  | 0 | 424000000  |
| 166 | 2015 | 6  | A07701-8LB  | 0 | 1620000000 |
| 167 | 2015 | 7  | A07701-8LB  | 1 | 147000000  |

|     |      |    |            |   |            |
|-----|------|----|------------|---|------------|
| 168 | 2015 | 8  | A07701-8LB | 1 | 513000000  |
| 169 | 2015 | 9  | A07701-8LB | 1 | 559000000  |
| 170 | 2015 | 10 | A07701-8LB | 0 | 466000000  |
| 171 | 2015 | 1  | A02449-100 | 0 | 719000000  |
| 172 | 2015 | 2  | A02449-100 | 0 | 931000000  |
| 173 | 2015 | 3  | A02449-100 | 0 | 2090000000 |
| 174 | 2015 | 4  | A02449-100 | 0 | 2400000000 |
| 175 | 2015 | 5  | A02449-100 | 1 | 2290000000 |
| 176 | 2015 | 6  | A02449-100 | 1 | 509000000  |
| 177 | 2015 | 7  | A02449-100 | 1 | 108000000  |
| 178 | 2015 | 8  | A02449-100 | 0 | 434000000  |
| 179 | 2015 | 9  | A02449-100 | 1 | 250000000  |
| 180 | 2015 | 10 | A02449-100 | 0 | 207000000  |
| 181 | 2015 | 1  | A05214-3LB | 1 | 805000000  |
| 182 | 2015 | 2  | A05214-3LB | 0 | 864000000  |
| 183 | 2015 | 3  | A05214-3LB | 0 | 1210000000 |
| 184 | 2015 | 4  | A05214-3LB | 0 | 1040000000 |
| 185 | 2015 | 5  | A05214-3LB | 0 | 139000000  |
| 186 | 2015 | 6  | A05214-3LB | 1 | 190000000  |
| 187 | 2015 | 7  | A05214-3LB | 0 | 172000000  |
| 188 | 2015 | 8  | A05214-3LB | 0 | 91400000   |
| 189 | 2015 | 9  | A05214-3LB | 0 | 3700000000 |
| 190 | 2015 | 10 | A05214-3LB | 0 | 431000000  |
| 191 | 2015 | 1  | A07781-4LB | 0 | 409000000  |
| 192 | 2015 | 2  | A07781-4LB | 1 | 1740000000 |
| 193 | 2015 | 3  | A07781-4LB | 1 | 192000000  |
| 194 | 2015 | 4  | A07781-4LB | 1 | 205000000  |
| 195 | 2015 | 5  | A07781-4LB | 1 | 231000000  |
| 196 | 2015 | 6  | A07781-4LB | 1 | 1100000000 |
| 197 | 2015 | 7  | A07781-4LB | 1 | 106000000  |
| 198 | 2015 | 8  | A07781-4LB | 1 | 108000000  |
| 199 | 2015 | 9  | A07781-4LB | 1 | 544000000  |
| 200 | 2015 | 10 | A07781-4LB | 1 | 59900000   |
| 201 | 2015 | 1  | 463-4      | 1 | 749000000  |
| 202 | 2015 | 2  | 463-4      | 1 | 584000000  |
| 203 | 2015 | 3  | 463-4      | 1 | 321000000  |
| 204 | 2015 | 4  | 463-4      | 0 | 1550000000 |
| 205 | 2015 | 5  | 463-4      | 1 | 3040000000 |
| 206 | 2015 | 6  | 463-4      | 0 | 137000000  |
| 207 | 2015 | 7  | 463-4      | 0 | 559000000  |
| 208 | 2015 | 8  | 463-4      | 1 | 1440000000 |
| 209 | 2015 | 9  | 463-4      | 1 | 58600000   |

|     |      |    |       |   |            |
|-----|------|----|-------|---|------------|
| 210 | 2015 | 10 | 463-4 | 1 | 63000000   |
| 211 | 2015 | 1  | P2-4  | 0 | 122000000  |
| 212 | 2015 | 2  | P2-4  | 1 | 167000000  |
| 213 | 2015 | 3  | P2-4  | 0 | 251000000  |
| 214 | 2015 | 4  | P2-4  | 0 | 2280000000 |
| 215 | 2015 | 5  | P2-4  | 1 | 475000000  |
| 216 | 2015 | 6  | P2-4  | 1 | 224000000  |
| 217 | 2015 | 7  | P2-4  | 1 | 2780000000 |
| 218 | 2015 | 8  | P2-4  | 1 | 501000000  |
| 219 | 2015 | 9  | P2-4  | 1 | 2210000000 |
| 220 | 2015 | 10 | P2-4  | 1 | 602000000  |

\*Lso status detemined based on molecular evaluation of 4 tubers/plant.
