# Supplementary material for: Characterization of host plant resistance to zebra chip disease from species-derived potato genotypes and the identification of new sources of zebra chip resistance
Source: PubMed Central journal article supplement (PMC5568414; doi:10.1371/journal.pone.0183283), 2017-08-23
Supplement: pone.0183283.s002.pdf [file pone.0183283.s002.pdf]

| ID | Year | Genotype   | Mean Fresh Symp.* | Mean Fried Symp.* | Mean Lso Titer* | Log Lso titer |
|----|------|------------|-------------------|-------------------|-----------------|---------------|
| 1  | 2014 | 463-4      | 1.5               | 1.75              | 107924.93       | 5.03          |
| 2  | 2014 | 463-4      | 0.75              | 2.25              | 372358.67       | 5.57          |
| 3  | 2014 | 463-4      | 1.5               | 1.5               | 31660.71        | 4.5           |
| 4  | 2015 | 463-4      | 0                 | 1.38              | 366616.87       | 5.56          |
| 5  | 2015 | 463-4      | 0                 | 0                 | 1494341.43      | 6.17          |
| 6  | 2015 | 463-4      | 0                 | 0                 | 1632261.33      | 6.21          |
| 7  | 2015 | 463-4      | 0.88              | 2                 | 75863599.1      | 7.88          |
| 8  | 2015 | 463-4      | 0                 | 0.75              | 21132.97        | 4.32          |
| 9  | 2015 | 463-4      | 0                 | 1                 | 32575.2         | 4.51          |
| 10 | 2015 | 463-4      | 0                 | 1.13              | 46189.91        | 4.66          |
| 11 | 2014 | A02449-100 | 1.25              | 1.75              | 1129791.47      | 6.05          |
| 12 | 2014 | A02449-100 | 0.75              | 2.5               | 6179298.52      | 6.79          |
| 13 | 2014 | A02449-100 | 0                 | 0.75              | 4535809.92      | 6.66          |
| 14 | 2015 | A02449-100 | 1.5               | 2.5               | 149165704       | 8.17          |
| 15 | 2015 | A02449-100 | 0                 | 1                 | 62105.26        | 4.79          |
| 16 | 2015 | A02449-100 | 0                 | 1                 | 47193.64        | 4.67          |
| 17 | 2015 | A02449-100 | 0                 | 1.13              | 8623214.51      | 6.94          |
| 18 | 2014 | A05214-3LB | 1                 | 1                 | 167915.03       | 5.23          |
| 19 | 2015 | A05214-3LB | 0                 | 1.38              | 58445.72        | 4.77          |
| 20 | 2015 | A05214-3LB | 1.88              | 2.75              | 48293170.95     | 7.68          |
| 21 | 2014 | A05379-211 | 3                 | 2                 | 79813.65        | 4.9           |
| 22 | 2014 | A05379-211 | 0                 | 0                 | 6271.74         | 3.8           |
| 23 | 2014 | A05379-211 | 0                 | 0                 | 1747.92         | 3.24          |
| 24 | 2014 | A05379-211 | 0                 | 0                 | 1171.14         | 3.07          |
| 25 | 2014 | A07701-6LB | 0                 | 2.25              | 151284.47       | 5.18          |
| 26 | 2014 | A07701-6LB | 1.5               | 1.5               | 64163.36        | 4.81          |
| 27 | 2014 | A07701-6LB | 0                 | 0.5               | 72299.74        | 4.86          |
| 28 | 2014 | A07701-6LB | 0.5               | 2.25              | 1301005.51      | 6.11          |
| 29 | 2014 | A07701-6LB | 2                 | 2.25              | 1301005.51      | 6.11          |
| 30 | 2015 | A07701-6LB | 0.63              | 1.5               | 15114575.59     | 7.18          |
| 31 | 2015 | A07701-6LB | 0                 | 1                 | 28769404.1      | 7.46          |
| 32 | 2014 | A07701-8LB | 3                 | 2.25              | 265955.48       | 5.42          |
| 33 | 2014 | A07701-8LB | 3                 | 2.75              | 92856.73        | 4.97          |
| 34 | 2014 | A07701-8LB | 3                 | 3                 | 92822.03        | 4.97          |
| 35 | 2014 | A07701-8LB | 3                 | 3                 | 116905.61       | 5.07          |
| 36 | 2015 | A07701-8LB | 0                 | 1.25              | 288237.6        | 5.46          |
| 37 | 2015 | A07701-8LB | 0                 | 1.25              | 41038.02        | 4.61          |
| 38 | 2015 | A07701-8LB | 0.13              | 0.88              | 163594.17       | 5.21          |
| 39 | 2015 | A07701-8LB | 0                 | 1.13              | 40993.38        | 4.61          |
| 40 | 2015 | A07701-8LB | 0                 | 1                 | 5678653.69      | 6.75          |
| 41 | 2014 | A07705-4LB | 2                 | 3                 | 244597.65       | 5.39          |

|    |      |            |      |      |             |      |
|----|------|------------|------|------|-------------|------|
| 42 | 2014 | A07705-4LB | 2    | 2.5  | 69722.75    | 4.84 |
| 43 | 2014 | A07705-4LB | 1    | 1.25 | 53505.56    | 4.73 |
| 44 | 2014 | A07705-4LB | 1.5  | 2.25 | 442287.31   | 5.65 |
| 45 | 2014 | A07705-4LB | 0.75 | 3    | 1108682.32  | 6.04 |
| 46 | 2014 | A07705-4LB | 0    | 0    | 22967.61    | 4.36 |
| 47 | 2015 | A07705-4LB | 0    | 1.25 | 18817.45    | 4.27 |
| 51 | 2014 | A07781-4LB | 0    | 1    | 1076679.27  | 6.03 |
| 52 | 2014 | A07781-4LB | 0    | 0    | 3472946.33  | 6.54 |
| 53 | 2014 | A07781-4LB | 0    | 1    | 98129.4     | 4.99 |
| 54 | 2015 | A07781-4LB | 0    | 1    | 1111775.81  | 6.05 |
| 55 | 2015 | A07781-4LB | 0.13 | 1    | 150151.48   | 5.18 |
| 56 | 2015 | A07781-4LB | 0.13 | 1.13 | 74064.22    | 4.87 |
| 57 | 2015 | A07781-4LB | 0    | 0    | 14299.56    | 4.16 |
| 58 | 2015 | A07781-4LB | 0    | 1    | 184347.19   | 5.27 |
| 59 | 2015 | A07781-4LB | 0    | 1    | 249225.54   | 5.4  |
| 60 | 2015 | A07781-4LB | 0    | 1    | 2786132.68  | 6.45 |
| 61 | 2015 | A07781-4LB | 0    | 1    | 607962.33   | 5.78 |
| 62 | 2015 | A07781-4LB | 0.25 | 1.13 | 687194.32   | 5.84 |
| 63 | 2014 | P2-4       | 3    | 3    | 848972.36   | 5.93 |
| 64 | 2014 | P2-4       | 2.5  | 2.75 | 3772132.16  | 6.58 |
| 65 | 2014 | P2-4       | 2.5  | 2.5  | 908321.88   | 5.96 |
| 66 | 2014 | P2-4       | 2    | 2.75 | 1970092.97  | 6.29 |
| 67 | 2015 | P2-4       | 0    | 1    | 69543.03    | 4.84 |
| 68 | 2015 | P2-4       | 0    | 1.5  | 64569.97    | 4.81 |
| 69 | 2015 | P2-4       | 0.13 | 1.38 | 37935.73    | 4.58 |
| 70 | 2015 | P2-4       | 0    | 1    | 26791.85    | 4.43 |
| 71 | 2015 | P2-4       | 0    | 1.13 | 74635.73    | 4.87 |
| 72 | 2015 | P2-4       | 0.25 | 2    | 87163.6     | 4.94 |
| 73 | 2015 | P2-4       | 0    | 1.25 | 71089.42    | 4.85 |
| 74 | 2014 | RB         | 3    | 1.5  | 42927.55    | 4.63 |
| 75 | 2014 | RB         | 2.5  | 2    | 56934.17    | 4.76 |
| 76 | 2015 | RB         | 0.13 | 1.25 | 31723.13    | 4.5  |
| 77 | 2015 | RB         | 2.25 | 1.88 | 14839937.4  | 7.17 |
| 78 | 2015 | RB         | 0.88 | 1.5  | 11798788.72 | 7.07 |

\*Mean Lso and symptom severities are based on 2 tubers in 2014 and 4 tubers in 2015
